# Supplementary material for: AFF3-DNA methylation interplay in maintaining the mono-allelic expression pattern of XIST in terminally differentiated cells
Source: PubMed Central journal article supplement — J Mol Cell Biol. 2018 Dec 7;11(9):761–9. doi: 10.1093/jmcb/mjy074 (PMC7727261; doi:10.1093/jmcb/mjy074), 2018-12-07
Supplement: supplementary_figures_mjy074.pdf [file supplementary_figures_mjy074.pdf]

**AFF3-DNA methylation interplay in maintaining the mono-allelic expression  
pattern of *XIST* in terminally differentiated cells**

Yue Zhang<sup>1</sup>, Chao Wang<sup>1</sup>, Xiaoxu Liu<sup>1</sup>, Qian Yang<sup>1</sup>, Hongliang Ji<sup>1</sup>, Mengjun Yang<sup>1</sup>,  
Manman Xu<sup>1</sup>, Yunyan Zhou<sup>1</sup>, Wei Xie<sup>1,2</sup>, Zhuojuan Luo<sup>1,2\*</sup>, Chengqi Lin<sup>1,2\*</sup>

## Figure S1

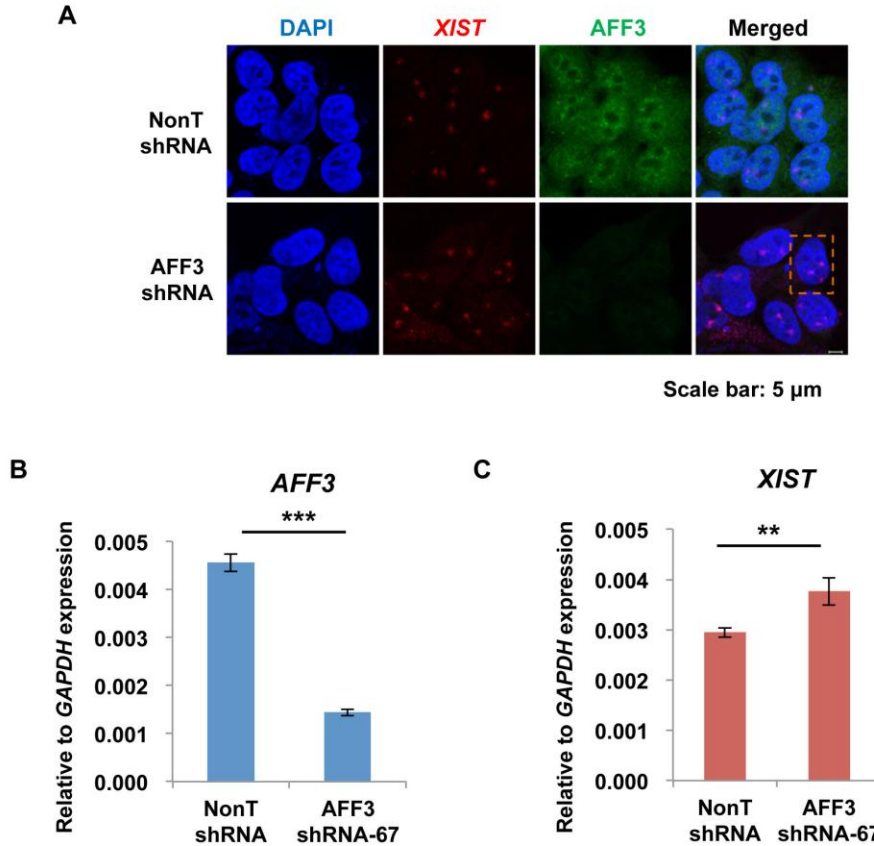

**Supplementary Figure S1.** Regulation of *XIST* gene expression by *AFF3*. (A) *XIST* RNA FISH (red) combined with *AFF3* immunostaining (green) in control and *AFF3* knockdown HEK293T cells. The orange box highlights HEK293T cells containing three *XIST* RNA clouds after *AFF3* knockdown. Scale bar represents 5  $\mu\text{m}$ . (B and C) Knockdown of *AFF3* using an independent shRNA leads to up-regulation of *XIST* RNA in IMR-90 cells. (B) RT-qPCR showing the efficiency of *AFF3* knockdown mediated by an independent shRNA in IMR-90 cells. (C) RT-qPCR showing an increase of *XIST* RNA level by treating with the independent *AFF3* shRNA in IMR-90 cells. (B and C) The expression of *AFF3* and *XIST* was normalized to the expression of *GAPDH*. Results shown are technical replicates from representative biological replicates. Error bars represent standard deviations. Significant differences are marked with an asterisk (t-test, \*  $p < 0.05$ ; \*\*  $p < 0.01$ ; \*\*\*  $p < 0.001$ ).

## Figure S2

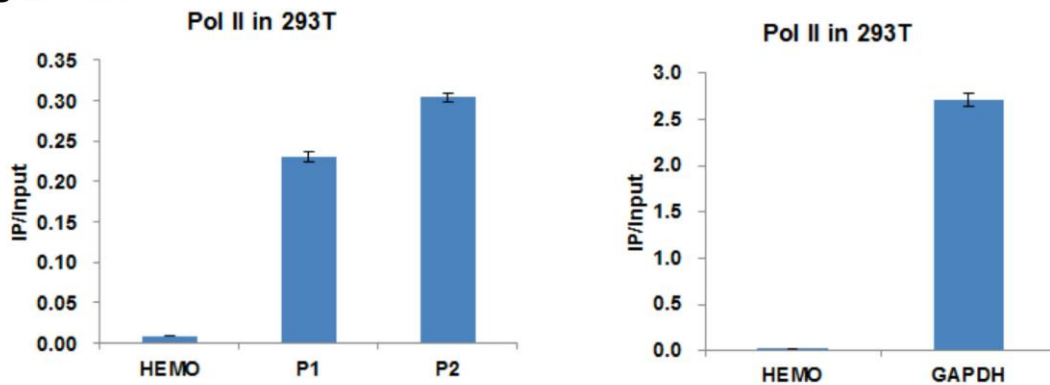

**Supplementary Figure S2.** Pol II ChIP-qPCR in HEK293T at the *XIST* DMR and the *GAPDH* promoter. The *HEMO* served as a negative control. Error bars represent standard deviations.

## Figure S3

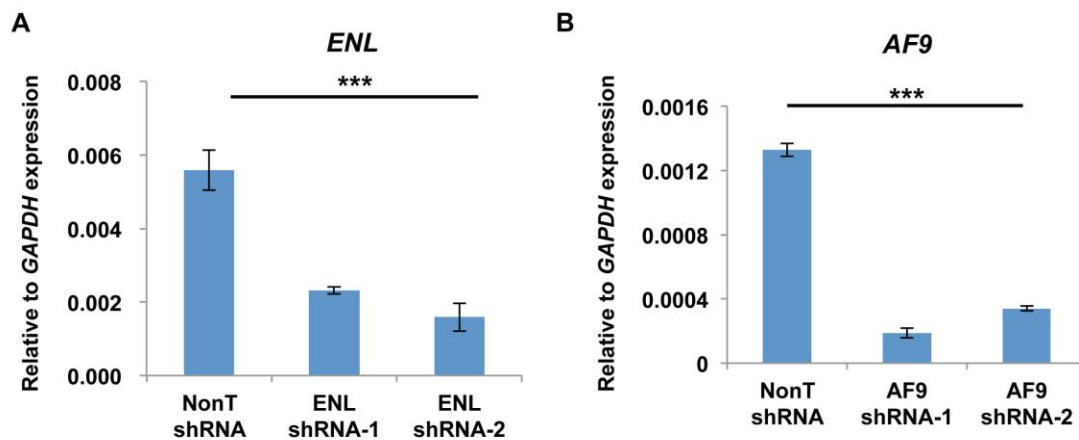

**Supplementary Figure S3.** Knockdown efficiency of ENL and AF9. (A and B) RT-qPCR showing the efficiency of shRNA-mediated ENL (A) and AF9 (B) knockdown in IMR-90 cells. The expression of *ENL* and *AF9* was normalized to the expression of *GAPDH*. Results shown are technical replicates from representative biological replicates. Error bars represent standard deviations. Significant differences are marked with an asterisk (t-test, \*  $p < 0.05$ ; \*\*  $p < 0.01$ ; \*\*\*  $p < 0.001$ ).

## Figure S4

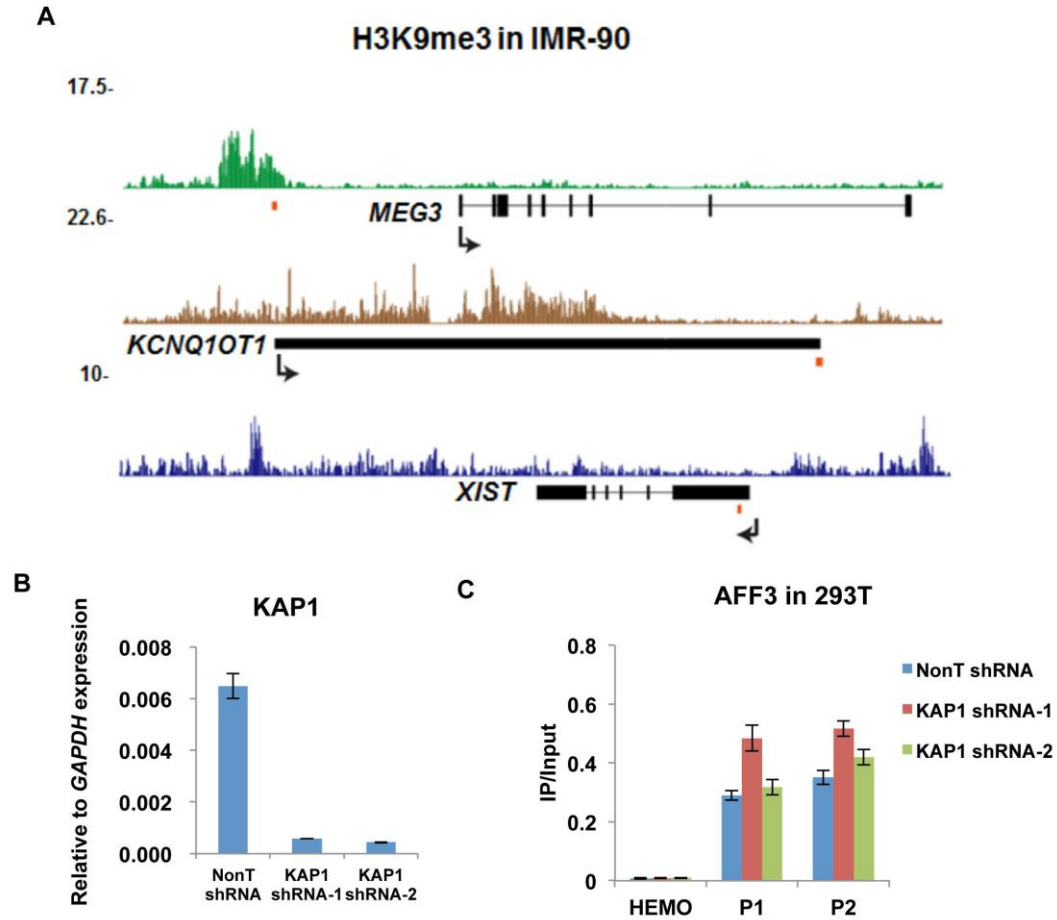

**Supplementary Figure S4.** The recruitment of AFF3 to the *XIST* DMR is KAP1 independent. (A) Track examples of H3K9me3 occupancies at imprinted genes in IMR-90 cells. (B) RT-qPCR showing the efficiency of shRNA-mediated KAP1 knockdown in IMR-90 cells. The expression of *KAP1* was normalized to the expression of *GAPDH*. Results shown are technical replicates from representative biological replicates. Error bars represent the standard deviation. (C) ChIP-qPCR showing that the occupancy of AFF3 at the *XIST* DMR remains unchanged after KAP1 knockdown in HEK293T cells. The *HEMO* gene serves as a negative control for ChIP-qPCR. Error bars represent the standard deviation.

**Figure S5**

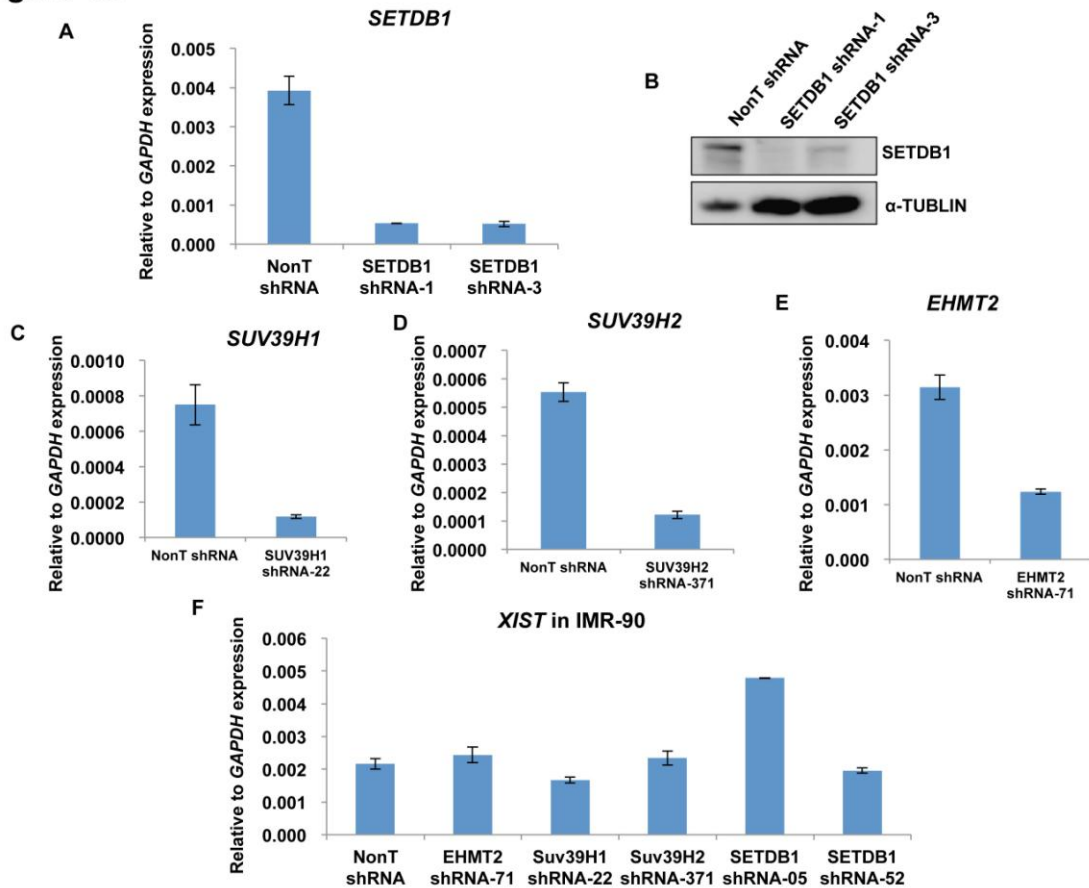

**Supplementary Figure S5.** Depletion of the H3K9 methyltransferases does not seem to have great effects on *XIST* expression. (A) RT-qPCR showing the efficiency of shRNA-mediated *SETDB1* knockdown in IMR-90 cells. (B) Knockdown of *SETDB1* by lentiviral mediated shRNA in IMR-90 cells. *SETDB1* protein levels were measured by western blotting.  $\alpha$ -TUBULIN was used as a loading control. (C-F) RT-qPCR showing the efficiency of shRNA-mediated *SUV39H1* (C), *SUV39H2* (D) and *EHMT2* (E) knockdown in IMR-90 cells. (F) RT-qPCR showing that *XIST* RNA level remains unchanged after *EHMT2*, *SUV39H1*, *SUV39H2* and *SETDB1* knockdown in IMR-90 cells. (A, C-F) The expression of the genes tested was normalized to the expression of *GAPDH*. Results shown are technical replicates from representative biological replicates. Error bars represent the standard deviation.

## Figure S6

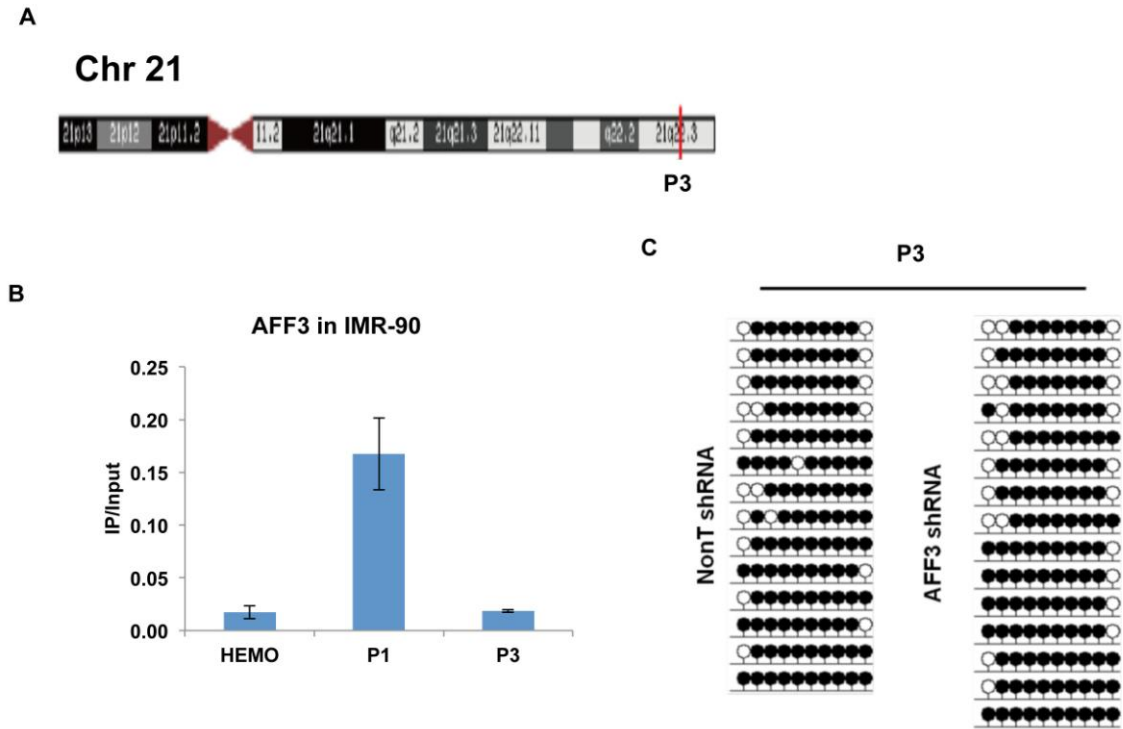

**Supplementary Figure S6.** AFF3 does not affect the methylation status of the AFF3 unbound region. (A) Schematic illustration of the location of the AFF3 unbound region (P3) located on chromosome 21. (B) ChIP-qPCR shows that AFF3 is recruited to the *XIST* DMR (P1) but not the P3 region on chromosome 21 in IMR-90 cells. The *HEMO* served as a negative control. Error bars represent standard deviations. (C) Bisulfite sequencing analysis of the P3 region in control and AFF3 knockdown IMR-90 cells. Methylated and unmethylated cytosines are designated by filled and unfilled circles, respectively. Each line indicates a unique DNA clone.
